# Supplementary material for: Acute inhibition of centriolar satellite function and positioning reveals their functions at the primary cilium
Source: PLoS Biol. 2020 Jun 18;18(6):e3000679. doi: 10.1371/journal.pbio.3000679 (PMC7326281; doi:10.1371/journal.pbio.3000679)
Supplement: S2 Table — Proteins with BFDR (<0.01) values were defined as part of the PCM1 interactomes. Tab 1: Unique peptides identified in control and rapamycin-treated cells (−Rapa versus +Rapa). Tab 2: Proteins enriched (>1.25-fold relative to control), depleted (<0.75-fold relative to control), and unaltered in rapamycin-treated cells relative to control cells. BFDR, Bayesian false discovery rate; FKBP, FK506 binding protein 12; PCM1, pericentriolar material 1; Rapa, rapamycin (XLSX) [file pbio.3000679.s008.xlsx]

## Sheet: Unique Peptides 
PlusRapa	MinusRapa
PCNT	TNIK
SPG20	OXSR1
NANP	NCK2
TJP1	STXBP4
DCTN1	GTSE1
GEMIN5	DVL1
MAGED1	YAP1
PPP6R3	ATP6V1A
EPB41	PATL1
ARFGAP1	NXPH1
PHACTR4	PLS1
DYNC1LI1	STX5
CEP170B	GKAP1
GAPVD1	EDC4
RAPH1	ZC2HC1A
LIMD1	REPS1
MAPT	CTNNAL1
UPF1	PPP1R2
TTC28	RBBP6
CCDC92	PEX5
SYAP1	TUBGCP2
FAM184A	BZW1
MAP4	WDR44
SNRPE	ADAR
AGFG1	UFD1L
DNM1L	TBCA
PRRC2A	ANAPC4
ZC3HAV1	DTX3L
DNMT1	EXOC1
NCK1	CASKIN2
FAM193A	TTC9C
MPHOSPH9	TRIP12
MICALL1	RB1CC1
PRRC2C	SMARCE1
BCAS2	PIP4K2A
NAV1	KIAA0100
C17orf53	SPAST
CNN2	VPS13A
ANKRD17	CEP89
TFIP11	USO1
RANBP2	DDX42
TANK	ATXN10
RFC4	RANBP1
MAPRE1	UTP15
AARS	SART1
LAMA5	PHF3
PLEKHA5	MSTO1
RPAP3	TDRD3
SNX5	PALLD
CEP350	ANKHD1
NUMB	MKI67
N4BP1	UTRN
LIMA1	AAK1
SLK	ATG2B
NUP62	ZNF318
GPI	CENPE
DCP1B	R3HCC1L
MPP1	RBM33
COG7	LZTFL1
TTF2	PLIN3
CENPH	TANC1
UBE2O	ABI1
DBNL	NFX1
RPAP2	BRIX1
SPAG9	CEP152
RNF10	FARSA
SCYL2	SYNJ1
ECD	IDH1
COPA	FXR1
ELP4	LTV1
NRBF2	CAMK1
TRIM9	SPATS2L
NEDD1	STK24
ZWINT	ASNS
CFAP36	SRGAP2C
KPNB1	SRGAP2
TXNDC9	EVI5
EPS8	PLA2G4A
MARK2	KIF4B
PRPF8	RTN4
YTHDC2	IPO9
GGA3	CCNT2
GGA1	PDLIM7
LMO7	BLOC1S4
KIAA1671	FBXL18
SKA3	COMMD8
CTNND1	GSE1
SUPT16H	PSME2
EIF5B	EIF2AK2
SPICE1	RASSF8
FMR1	NEFM
TCHP	DFNA5
ZYX	TES
ZNF598	CYB5R3
GAK	DLG1
ARHGAP17	TBC1D10B
BRAP	C16orf59
RANGAP1	SIK2
DIAPH3	BRD4
PAK4	CEP83
CUL4B	PAWR
FERMT2	ICE2
STAM	PIK3C3
CAMSAP1	NFKB1
WDR36	C19orf43
SEC24B	GCOM2
ERCC6L	FNBP1
SMG7	AZI2
ERC1	IKBKAP
FAM114A2	CCDC174
CSDE1	PIH1D1
VPS54	TSNAX
UBAP2	MYO6
CCDC132	ATG4C
UBE2M	CCDC28A
CDC20	CDC73
WDR43	ABCF1
PRMT7	CDK1
NCAPG	MNS1
RNF214	DIS3
CPSF3	TPD52L2
PPP1R9B	PCNT
AMOT	SPG20
YARS	NANP
TBC1D15	TJP1
ENSA	DCTN1
N4BP2	GEMIN5
CAMSAP2	MAGED1
CSTF2	PPP6R3
DHX29	EPB41
LARP1	ARFGAP1
NUP214	PHACTR4
CIAPIN1	DYNC1LI1
CEP85	CEP170B
MLLT4	GAPVD1
	RAPH1
CKAP5	LIMD1
H2AFY	MAPT
KIF23	UPF1
CCDC50	TTC28
WWOX	CCDC92
NHLRC2	SYAP1
BAG3	FAM184A
TLN1	MAP4
STAT3	SNRPE
AP3D1	AGFG1
PNN	DNM1L
SLC16A1	PRRC2A
ARFGAP3	ZC3HAV1
TKT	DNMT1
SH3PXD2B	NCK1
CCNB1	FAM193A
DVL3	MPHOSPH9
CSTF2T	MICALL1
PDLIM1	PRRC2C
VCPIP1	BCAS2
RUFY1	NAV1
LUZP1	C17orf53
TXLNG	CNN2
BUB1B	ANKRD17
TXLNA	TFIP11
EDF1	RANBP2
EIF5	TANK
CCDC14	RFC4
EIF2A	MAPRE1
IPO7	AARS
FBXO5	LAMA5
ARHGAP21	PLEKHA5
TBC1D2B	RPAP3
ARFIP1	SNX5
NUF2	CEP350
CEP44	NUMB
SNCA	N4BP1
KATNA1	LIMA1
MKL2	SLK
MCM10	NUP62
ANKRD26	GPI
SARS	DCP1B
KIF7	MPP1
ETF1	COG7
TPD52	TTF2
HN1L	CENPH
CCDC6	UBE2O
PXN	DBNL
CEP164	RPAP2
HLCS	SPAG9
EPS15L1	RNF10
ARCN1	SCYL2
COPG2	ECD
MOB3A	COPA
PPFIA1	ELP4
ATIC	NRBF2
CDV3	TRIM9
HMMR	NEDD1
SWAP70	ZWINT
XRN1	CFAP36
CEP72	KPNB1
PEA15	TXNDC9
VIPAS39	EPS8
GIT2	MARK2
PPP2R5D	PRPF8
	YTHDC2
HDDC2	GGA3
PDLIM5	GGA1
TNRC6B	LMO7
GPRASP2	KIAA1671
SNX1	SKA3
CEP170	CTNND1
SH3GL1	SUPT16H
ADRBK1	EIF5B
EFHD2	SPICE1
DCP1A	FMR1
SECISBP2	TCHP
CLINT1	ZYX
KIF14	ZNF598
NEK1	GAK
GCFC2	ARHGAP17
SAP30BP	BRAP
CSNK1D	RANGAP1
USP15	DIAPH3
TP53BP2	PAK4
CNN3	CUL4B
RDX	FERMT2
CKAP2	STAM
SRP68	CAMSAP1
PDLIM4	WDR36
HAUS2	SEC24B
PTPN11	ERCC6L
EIF4G3	SMG7
SNAP29	ERC1
TNIP1	FAM114A2
EPB41L3	CSDE1
EIF4ENIF1	VPS54
GOLGA3	UBAP2
SH3D19	CCDC132
TRIM25	UBE2M
CALD1	CDC20
MTMR1	WDR43
BCAS3	PRMT7
CLASP1	NCAPG
TIPRL	RNF214
GIGYF2	CPSF3
STMN1	PPP1R9B
CORO1B	AMOT
PKN2	YARS
HAUS3	TBC1D15
CHMP5	ENSA
IFT74	N4BP2
CTPS1	CAMSAP2
HBS1L	CSTF2
CD2AP	DHX29
CAST	LARP1
UNC45A	NUP214
SEPT9	CIAPIN1
CRK	CEP85
AHNAK	MLLT4
STAT1	EIF4G2
TBC1D5	CKAP5
SMG9	H2AFY
ACBD3	KIF23
PSMD4	CCDC50
	WWOX
EHBP1	NHLRC2
PMPCA	BAG3
IFT46	TLN1
HMG20A	STAT3
NSDHL	AP3D1
BICD1	PNN
CIRH1A	SLC16A1
TMF1	ARFGAP3
KIAA1468	TKT
RAB8A	SH3PXD2B
ANK3	CCNB1
AIMP2	DVL3
THOC2	CSTF2T
GTF2A1	PDLIM1
EPN1	VCPIP1
SRSF11	RUFY1
CHMP7	LUZP1
PSMD13	TXLNG
UPF3B	BUB1B
AKAP2	TXLNA
PRRC2B	EDF1
STK3	EIF5
MAP4K4	CCDC14
TAB3	EIF2A
SCYL3	IPO7
VPS11	FBXO5
COPB1	ARHGAP21
NOL11	TBC1D2B
SDCBP	ARFIP1
KIAA0586	NUF2
IGBP1	CEP44
SEPT2	SNCA
CNOT11	KATNA1
NEK9	MKL2
BBS7	MCM10
STRAP	ANKRD26
MED29	SARS
SNX4	KIF7
TTC12	ETF1
OSBPL11	TPD52
CAP1	HN1L
C11orf49	CCDC6
KIAA1524	PXN
ANKS1A	CEP164
CEP95	HLCS
NUDC	EPS15L1
PYGL	ARCN1
SNW1	COPG2
BTF3	MOB3A
PCM1	PPFIA1
TTK	ATIC
MRE11A	CDV3
CCDC85C	HMMR
RPRD2	SWAP70
RANBP3	XRN1
SH3GLB1	CEP72
LYPLA2	PEA15
GLE1	VIPAS39
CCDC77	GIT2
SEC31A	PPP2R5D
SUGP1	EIF4H
HN1	HDDC2
UACA	PDLIM5
CTTN	TNRC6B
ODF2L	GPRASP2
HDLBP	SNX1
SNX2	CEP170
DLGAP5	SH3GL1
CCNT1	ADRBK1
DVL2	EFHD2
FXR2	DCP1A
C20orf27	SECISBP2
RBM27	CLINT1
EXOC4	KIF14
HAUS6	NEK1
BUB1	GCFC2
TPR	SAP30BP
CEP55	CSNK1D
PDCD5	USP15
AGTPBP1	TP53BP2
KLC2	CNN3
KPNA4	RDX
CLASP2	CKAP2
KIF3A	SRP68
CCDC22	PDLIM4
CCP110	HAUS2
LRRFIP1	PTPN11
ZC3H15	MTOR
PLEKHA1	SNAP29
NAP1L4	TNIP1
SAMD4B	EPB41L3
PDCD6IP	EIF4ENIF1
CPNE3	GOLGA3
HAUS8	SH3D19
SMU1	TRIM25
CEP112	CALD1
SASS6	MTMR1
ENAH	BCAS3
RPGRIP1L	CLASP1
TROAP	TIPRL
CUL1	GIGYF2
DEPDC1B	STMN1
IFT20	CORO1B
OCRL	PKN2
CBL	HAUS3
ABCF2	CHMP5
IFT57	IFT74
EGLN1	CTPS1
CCNB2	HBS1L
MAD2L2	CD2AP
ADSL	CAST
SPEN	UNC45A
CFAP97	SEPT9
TACC3	CRK
CRKL	AHNAK
SMG6	STAT1
VCL	TBC1D5
CCDC43	SMG9
TEX9	ACBD3
VPS25	PSMD4
NUDT5	EIF3L
CEP131	EHBP1
FKBP1A	PMPCA
PLS3	IFT46
GCC2	HMG20A
WIPI2	NSDHL
ZFYVE16	BICD1
BAIAP2	CIRH1A
PLRG1	TMF1
WIBG	KIAA1468
NUMBL	RAB8A
PRPF3	ANK3
CHMP2B	AIMP2
IRAK1	THOC2
C15orf38-AP3S2	GTF2A1
TBCE	EPN1
HAUS1	SRSF11
CXorf56	CHMP7
RBM26	PSMD13
CSPP1	UPF3B
VBP1	AKAP2
SMAP1	PRRC2B
SUGT1	STK3
CC2D1A	MAP4K4
PGAM4	TAB3
SHC1	SCYL3
FUBP3	VPS11
PHAX	COPB1
RPN1	NOL11
SPDL1	SDCBP
PPP1R12A	KIAA0586
TXNL1	IGBP1
HACD3	SEPT2
STRN	CNOT11
PRUNE	NEK9
CCDC138	BBS7
ORC2	STRAP
NFKBIE	MED29
CEP63	SNX4
CCDC124	TTC12
MAPRE2	OSBPL11
KIAA0753	CAP1
TAF7	C11orf49
KIF16B	KIAA1524
SNX9	ANKS1A
MIB1	CEP95
FGFR1OP	NUDC
KIZ	PYGL
NMT1	SNW1
ABCF3	BTF3
DPYSL4	PCM1
ARHGEF16	TTK
CCDC18	MRE11A
CCDC93	CCDC85C
ANLN	RPRD2
SRP54	RANBP3
SPATS2	SH3GLB1
KPNA3	LYPLA2
TTC4	GLE1
SNX6	CCDC77
STRN4	SEC31A
IFIT5	SUGP1
PICALM	HN1
HCFC1	UACA
TRAF3IP1	CTTN
TBC1D31	ODF2L
CHMP4B	HDLBP
OLA1	SNX2
DDX10	DLGAP5
SDCCAG3	CCNT1
PIBF1	DVL2
CEP128	FXR2
ODF2	C20orf27
HOOK1	RBM27
CEP57	EXOC4
OFD1	HAUS6
CYLD	BUB1
C10orf88	TPR
CEP162	CEP55
STRN3	PDCD5
PLK1	AGTPBP1
KIF5B	ACACB
MAP7D3	KPNA4
LASP1	CLASP2
UBAP1	KIF3A
PDAP1	CCDC22
FAM91A1	CCP110
USP14	LRRFIP1
SSX2IP	ZC3H15
IPO8	PLEKHA1
MDC1	NAP1L4
TPX2	SAMD4B
CCDC66	PDCD6IP
KIAA1328	CPNE3
IK	HAUS8
SENP2	SMU1
CAMSAP3	CEP112
THOC7	SASS6
MTOR	ENAH
PIK3C2A	RPGRIP1L
DNAAF2	TROAP
ZC3H14	CUL1
CSNK1A1L	DEPDC1B
CHD4	IFT20
BZW2	OCRL
TARDBP	CBL
RIC8A	ABCF2
DCTN2	IFT57
DZIP1	EGLN1
APC	CCNB2
CTTNBP2NL	MAD2L2
EIF3H	ADSL
NDE1	SPEN
MOB3B	CFAP97
GOLPH3	TACC3
MPRIP	CRKL
IFT81	SMG6
TUBA1B	VCL
GAS8	CCDC43
ZC3H4	TEX9
TK1	VPS25
FAM50A	NUDT5
KARS	CEP131
RPF2	FKBP1A
CRTC1	PLS3
AHSA1	GCC2
ZNF655	WIPI2
LRCH2	ZFYVE16
CDC123	BAIAP2
GLCCI1	PLRG1
C1orf198	WIBG
HSD17B4	NUMBL
CCHCR1	PRPF3
TCERG1	CHMP2B
GTF2E2	IRAK1
PHB2	C15orf38-AP3S2
EIF3E	TBCE
CCDC101	HAUS1
USP9Y	CXorf56
XIAP	RBM26
RICTOR	CSPP1
SCOC	VBP1
SEL1L	SMAP1
UTP14A	SUGT1
DDOST	CC2D1A
CEP97	PGAM4
HNRNPAB	SHC1
NUCKS1	FUBP3
C2CD4C	PHAX
PGK1	RPN1
TPPP	SPDL1
POLDIP3	PPP1R12A
RBM17	TXNL1
SMAP2	HACD3
FKBP3	STRN
NSFL1C	PRUNE
VPS53	CCDC138
WAPAL	ORC2
LCA5	NFKBIE
ACIN1	CEP63
CCDC112	CCDC124
	MAPRE2
	KIAA0753
	TAF7
	KIF16B
	SNX9
	MIB1
	FGFR1OP
	KIZ
	NMT1
	ABCF3
	DPYSL4
	ARHGEF16
	CCDC18
	CCDC93
	ANLN
	SRP54
	SPATS2
	KPNA3
	TTC4
	SNX6
	STRN4
	IFIT5
	PICALM
	HCFC1
	TRAF3IP1
	TBC1D31
	CHMP4B
	OLA1
	DDX10
	SDCCAG3
	PIBF1
	CEP128
	ODF2
	HOOK1
	CEP57
	OFD1
	CYLD
	C10orf88
	CEP162
	STRN3
	PLK1
	KIF5B
	MAP7D3
	LASP1
	UBAP1
	PDAP1
	FAM91A1
	USP14
	SSX2IP
	IPO8
	MDC1
	TPX2
	CCDC66
	KIAA1328
	IK
	SENP2
	CAMSAP3
	THOC7

## Sheet: PlusRapaRelative
Rapa enriched >1.25	Rapa depleted <0.75	Unaltered
MSN	SPICE1	PGAM4
SEPT8	EIF5B	SHC1
LIMCH1	SUPT16H	FUBP3
LPP	CTNND1	PHAX
DNAJB1	SKA3	RPN1
CNOT10	KIAA1671	CC2D1A
CDR2L	GGA1	SUGT1
ZNF512	LMO7	SMAP1
AMOTL1	GGA3	VBP1
PSMD8	ZWINT	CSPP1
ABL2	CFAP36	RBM26
SYDE1	KPNB1	CXorf56
GSPT1	TXNDC9	HAUS1
DBN1	EPS8	TBCE
EURL	MARK2	C15orf38-AP3S2
TNNC2	PRPF8	IRAK1
DTNA	YTHDC2	PRPF3
ZW10	TRIM9	CHMP2B
DOCK7	NEDD1	ZFYVE16
CDR2	NRBF2	BAIAP2
RAI14	COPA	PLRG1
NPLOC4	ELP4	WIBG
CSRP2	ECD	NUMBL
FHOD1	RNF10	WIPI2
DIAPH2	SCYL2	GCC2
FAM193B	SPAG9	PLS3
STRIP1	RPAP2	FKBP1A
GOLGA5	DBNL	CEP131
BPNT1	NUP62	VPS25
IPMK	GPI	NUDT5
MAP4K5	DCP1B	CCDC43
RAB3GAP1	MPP1	TEX9
RNF25	COG7	SMG6
DNMBP	TTF2	VCL
RBSN	CENPH	CRKL
BMP2K	UBE2O	TACC3
VASP	SLK	MAD2L2
AP3B1	LIMA1	ADSL
BAIAP2L1	N4BP1	SPEN
DIP2A	NUMB	CFAP97
KIF3B	CEP350	CCNB2
MED4	SNX5	EGLN1
DLD	RPAP3	IFT57
BICC1	PLEKHA5	RPGRIP1L
UBFD1	LAMA5	TROAP
TFAP2B	TANK	CUL1
NT5DC2	RFC4	DEPDC1B
ITGB3BP	MAPRE1	IFT20
PDRG1	AARS	OCRL
GTF3C4	RANBP2	CBL
COPZ1	TFIP11	ABCF2
TOX2	ANKRD17	ENAH
CTIF	C17orf53	SMU1
ANXA6	CNN2	CEP112
NAA15	NAV1	SASS6
MAPKAPK2	BCAS2	HAUS8
ELOVL1	MICALL1	SAMD4B
G3BP2	PRRC2C	PDCD6IP
AVEN	MPHOSPH9	CPNE3
NOP14	FAM193A	NAP1L4
PRKAR2A	DNMT1	LRRFIP1
ALDH3A2	NCK1	ZC3H15
PSMD12	ZC3HAV1	PLEKHA1
UGGT1	PRRC2A	CCP110
GCC1	SNRPE	KIF3A
UBP1	AGFG1	CCDC22
MAD1L1	DNM1L	CLASP2
EIF2S3	MAP4	KPNA4
FARSB	FAM184A	PDCD5
DUSP12	SYAP1	AGTPBP1
PPID	CCDC92	ACACB
FBXW11	TTC28	CEP55
KIAA1211	UPF1	BUB1
L3MBTL3	MAPT	TPR
WASL	LIMD1	HAUS6
PSMA4	RAPH1	EXOC4
AFF4	GAPVD1	C20orf27
GIPC1	CEP170B	RBM27
SH3KBP1	DYNC1LI1	FXR2
RAB3GAP2	PHACTR4	CCNT1
PPP1R10	ARFGAP1	DVL2
NUCB2	EPB41	DLGAP5
EXOC3	PPP6R3	SNX2
FAXDC2	MAGED1	ODF2L
LARP4	GEMIN5	HDLBP
MYH7B	DCTN1	CTTN
DDX5	TJP1	UACA
RAB10	NANP	HN1
PIK3C2A	SPG20	SUGP1
DNAAF2	PCNT	SEC31A
ZC3H14	TNIK	CCDC77
CSNK1A1L	OXSR1	GLE1
CHD4	NCK2	RANBP3
BZW2	STXBP4	SH3GLB1
TARDBP	GTSE1	LYPLA2
RIC8A	DVL1	RPRD2
DCTN2	YAP1	CCDC85C
DZIP1	ATP6V1A	MRE11A
APC	PATL1	TTK
CTTNBP2NL	NXPH1	PCM1
EIF3H	PLS1	BTF3
NDE1	TSNAX	SNW1
MOB3B	MYO6	PYGL
GOLPH3	ATG4C	NUDC
MPRIP	CCDC28A	CEP95
IFT81	CDC73	ANKS1A
	ABCF1	STAT1
GAS8	CDK1	TBC1D5
ZC3H4	STX5	SMG9
TK1	GKAP1	ACBD3
FAM50A	EDC4	PSMD4
KARS	ZC2HC1A	EIF3L
RPF2	REPS1	EHBP1
CRTC1	CTNNAL1	PMPCA
AHSA1	PPP1R2	IFT46
ZNF655	RBBP6	HMG20A
LRCH2	PEX5	NSDHL
CDC123	TUBGCP2	BICD1
GLCCI1	BZW1	CIRH1A
C1orf198	WDR44	TMF1
HSD17B4	ADAR	KIAA1468
CCHCR1	UFD1L	RAB8A
TCERG1	MNS1	ANK3
GTF2E2	DIS3	AIMP2
PHB2	TPD52L2	THOC2
EIF3E	TBCA	GTF2A1
CCDC101	ANAPC4	EPN1
USP9Y	DTX3L	SRSF11
XIAP	EXOC1	CHMP7
RICTOR	CASKIN2	PSMD13
SCOC	TTC9C	UPF3B
SEL1L	TRIP12	AKAP2
UTP14A	RB1CC1	PRRC2B
DDOST	SMARCE1	STK3
CEP97	PIP4K2A	MAP4K4
HNRNPAB	KIAA0100	TAB3
NUCKS1	SPAST	SCYL3
C2CD4C	VPS13A	VPS11
PGK1	CEP89	COPB1
TPPP	USO1	NOL11
POLDIP3	DDX42	SDCBP
RBM17	ATXN10	KIAA0586
SMAP2	RANBP1	IGBP1
FKBP3	UTP15	SEPT2
NSFL1C	SART1	CNOT11
VPS53	PHF3	NEK9
WAPAL	MSTO1	BBS7
LCA5	TDRD3	STRAP
ACIN1	PALLD	MED29
CCDC112	ANKHD1	SNX4
KLC2	MKI67	TTC12
TUBA1B	UTRN	OSBPL11
NSF	AAK1	CAP1
NDC80	ATG2B	C11orf49
TRIM37	ZNF318	KIAA1524
EPB41L2	CENPE	AHNAK
NCAPH	R3HCC1L	CRK
TNPO2	RBM33	SEPT9
AP2S1	LZTFL1	UNC45A
KPNA6	PLIN3	CAST
KEAP1	TANC1	HBS1L
KIF20A	ABI1	CD2AP
WDR70	NFX1	CTPS1
SLC36A4	BRIX1	IFT74
KATNAL1	CEP152	CHMP5
PRPF19	FARSA	PKN2
CKAP2L	SYNJ1	HAUS3
HAUS4	IDH1	STMN1
DAP	FXR1	CORO1B
FAM161A	LTV1	GIGYF2
PRIM2	CAMK1	TIPRL
TRIP6	SPATS2L	CLASP1
MTMR6	STK24	MTMR1
IPO5	ASNS	BCAS3
CCDC15	SRGAP2C	CALD1
PSPC1	SRGAP2	GOLGA3
CAND1	EVI5	SH3D19
NUP133	PLA2G4A	TRIM25
MTDH	KIF4B	EIF4ENIF1
INPPL1	RTN4	SNAP29
SMAP	IPO9	TNIP1
PFKP	CCNT2	EPB41L3
RPS5	PDLIM7	HAUS2
CXorf57	BLOC1S4	PTPN11
DHX36	FBXL18	EIF4G3
ILKAP	COMMD8	PDLIM4
RILPL1	GSE1	SRP68
FIP1L1	PSME2	CKAP2
PIP4K2C	EIF2AK2	RDX
TRIM26	RASSF8	CNN3
ZC3H18	NEFM	TP53BP2
DIDO1	DFNA5	KIF14
FAM117B	TES	NEK1
POLH	CYB5R3	GCFC2
PTK2	DLG1	SAP30BP
MLF1	TBC1D10B	CSNK1D
KIF18B	C16orf59	USP15
CEP85L	SIK2	CLINT1
GIT1	BRD4	SECISBP2
PDZRN3	CEP83	DCP1A
DPY30	PAWR	EFHD2
POLA2	ICE2	ADRBK1
IQCB1	PIK3C3	SH3GL1
BAZ1B	NFKB1	CEP170
EEF2K	C19orf43	SNX1
TOM1L2	GCOM2	GPRASP2
USP7	FNBP1	TNRC6B
ATG3	AZI2	PEA15
TBC1D22B	IKBKAP	VIPAS39
SUPT5H	CCDC174	GIT2
DARS2	PIH1D1	PPP2R5D
CCDC9		EIF4H
STARD13		HDDC2
RRBP1		PDLIM5
MAEA		CEP72
LRRC40		XRN1
DNAJC12		SWAP70
FNDC3A		HMMR
TSC1		MOB3A
TBL3		PPFIA1
RPN1		ATIC
MTOR		CDV3
THOC7		COPG2
CAMSAP3		ARCN1
SENP2		EPS15L1
IK		HLCS
CCDC66		CEP164
KIAA1328		PXN
MDC1		TPD52
TPX2		HN1L
IPO8		CCDC6
SSX2IP		ETF1
FAM91A1		KIF7
USP14		ANKRD26
LASP1		SARS
UBAP1		MCM10
PDAP1		MKL2
MAP7D3		FBXO5
KIF5B		ARHGAP21
PLK1		TBC1D2B
CYLD		ARFIP1
C10orf88		NUF2
CEP162		CEP44
STRN3		SNCA
OFD1		KATNA1
HOOK1		IPO7
CEP57		EIF2A
ODF2		CCDC14
CEP128		EIF5
PIBF1		EDF1
CHMP4B		TXLNA
OLA1		BUB1B
DDX10		TXLNG
SDCCAG3		LUZP1
TBC1D31		RUFY1
TRAF3IP1		VCPIP1
HCFC1		CSTF2T
PICALM		PDLIM1
IFIT5		DVL3
TTC4		CCNB1
SNX6		ARFGAP3
STRN4		TKT
SRP54		SH3PXD2B
SPATS2		SLC16A1
KPNA3		PNN
ANLN		AP3D1
CCDC93		STAT3
ARHGEF16		TLN1
CCDC18		H2AFY
DPYSL4		KIF23
ABCF3		CCDC50
KIZ		WWOX
NMT1		NHLRC2
FGFR1OP		BAG3
TAF7		CKAP5
KIF16B		EIF4G2
SNX9		MLLT4
MIB1		CIAPIN1
KIAA0753		CEP85
MAPRE2		NUP214
CCDC124		LARP1
CEP63		CSTF2
ORC2		DHX29
NFKBIE		N4BP2
CCDC138		CAMSAP2
PRUNE		ENSA
STRN		YARS
HACD3		TBC1D15
PPP1R12A		AMOT
TXNL1		PPP1R9B
SPDL1		CPSF3
PGAM4		VPS54
SHC1		UBAP2
FUBP3		CCDC132
PHAX		UBE2M
		CDC20
		WDR43
		PRMT7
		NCAPG
		RNF214
		CSDE1
		FAM114A2
		ERC1
		SMG7
		SEC24B
		ERCC6L
		WDR36
		CAMSAP1
		PAK4
		CUL4B
		FERMT2
		STAM
		DIAPH3
		RANGAP1
		GAK
		ARHGAP17
		BRAP
		ZNF598
		ZYX
		FMR1
		TCHP
