# Supplementary material for: Acute inhibition of centriolar satellite function and positioning reveals their functions at the primary cilium
Source: PLoS Biol. 2020 Jun 18;18(6):e3000679. doi: 10.1371/journal.pbio.3000679 (PMC7326281; doi:10.1371/journal.pbio.3000679)
Supplement: S4 Data — The data and statistical analysis that correspond to Fig 3C and 3D and S4B Fig. GO, Gene Ontology; PCM1, pericentriolar material 1 (XLSX) [file pbio.3000679.s017.xlsx]

## Sheet: Fig. 3C
Biological process	-log10
regulation of cell cycle G2/M phase transition	22.65
cilium assembly	21.84
basal body-plasma membrane docking	20.85
mitotic cell cycle phase transition	20.21
organelle assembly	17.06
endosomal transport	12.06
mitotic spindle organization	9.99
sister chromatid segregation	9.29
vesicle mediated transport	9.23
regulation of translation	9.12

## Sheet: Fig. 3D
Cellular compartment	-log10
microtubule organizing center	48.96
centrosome	47.65
microtubule cytoskeleton	22.65
spindle	19.08
centriole	12.11
spindle pole	10.16
focal adhesion	9.11
cytoskeletal fiber	8.79
actin cytoskeleton	6.89
centriolar satellite	6.71

## Sheet: Fig. S4B
Biological Process	-log10
cilium assembly	9.48386
mitotic nuclear division	7.97634
ciliary basal body-plasma membrane docking	7.77134
regulation of mitotic cell cycle phase transition	7.01073
mitotic sister chromatid segregation	5.48825
spindle assembly checkpoint	5.44953
intracellular protein transport	4.7841
protein import into nucleus	4.67223
mitotic cytokinesis	4.61083
mitotic metaphase plate congression	4.4318
Biological Process	-log10
mitotic spindle organization	5.95273
regulation of mitotic cell cycle	5.83003
vesicle-mediated transport	5.74569
cytosolic transport	5.34496
positive regulation of cellular protein localization	5.21817
endosomal transport	5.21631
ciliary basal body-plasma membrane docking	5.09458
nuclear import	5.00511
cytoplasmic microtubule organization	4.96297
neuron projection development	4.13978
