# Supplementary material for: Acute inhibition of centriolar satellite function and positioning reveals their functions at the primary cilium
Source: PLoS Biol. 2020 Jun 18;18(6):e3000679. doi: 10.1371/journal.pbio.3000679 (PMC7326281; doi:10.1371/journal.pbio.3000679)
Supplement: S6 Data — The data and statistical analysis that correspond to Fig 5C and 5D and S6A, 6C, S6D and S6F Fig. IMCD3, inner medullary collecting duct (XLSX) [file pbio.3000679.s019.xlsx]

## Sheet: Fig. 5C
	minusRapa	minusRapa	minusRapa	plusRapa	plusRapa	plusRapa		Sidak's multiple comparisons test	Mean Diff.	95.00% CI of diff.	Significant?	Summary
	exp#1	exp#2	exp#3	exp#1	exp#2	exp#3
Apoptosis	12.5	5.26	11.76	10.53	16.67	9.52		-Rapa - +Rapa
Mitotic Arrest	4.17	15.79	11.76	10.53	5.56	4.76		Apoptosis	-2.4	-24.51 to 19.71	No	ns
Completed Mitosis	83.33	78.95	76.47	78.95	77.78	85.71		Mitotic Arrest	3.623	-18.49 to 25.74	No	ns
								Complete Mitosis	-1.23	-23.34 to 20.88	No	ns
	-Rapa			+Rapa
	Mean	SD	N	Mean	SD	N
Apoptosis	9.84	3.98362	3	12.24	3.86959	3
Mitotic Arrest	10.5733	5.90019	3	6.95	3.12607	3
Completed Mitosis	79.5833	3.47358	3	80.8133	4.2808	3
	-Rapa			+Rapa
	Mean	SEM	N	Mean	SEM	N
Apoptosis	9.84	2.29994	3	12.24	2.23411	3
Mitotic Arrest	10.5733	3.40648	3	6.95	1.80484	3
Completed Mitosis	79.5833	2.00547	3	80.8133	2.47152	3

## Sheet: Fig. 5D
	minus Rapa	plus Rapa	minus Rapa	plus Rapa
	mitotic time	mitotic time	cytokinetic time	cytokinetic time
	exp#1	exp#2	exp#1	exp#2
	10	33	5	28		Mitotic time
	25	35	20	140		Unpaired t test
	20	46	5	27		P value	0.7235
	15	21	25	42		P value summary	ns
	34	21	10	14		Significantly different (P < 0.05)?	No
	45	21	10	7		One- or two-tailed P value?	Two-tailed
	20	33	60	58		t, df	t=0.3560, df=46
	80	32	70	24
	50	30	30	12		Cytokinesis time
	20	28	21	14		Unpaired t test
	42	49	57	17		P value	0.879
	35	46	4	21		P value summary	ns
	18	21	7	17		Significantly different (P < 0.05)?	No
	25	42	119	7		One- or two-tailed P value?	Two-tailed
	38	21	53	14		t, df	t=0.1531, df=43
	21	35	71	14
	35	21	4	24
	49	60	28	46
	38	49	32	21
	35	28	28	126
	31	21		32
	42	28		53
	17			71
	28			4
	29			28
	14
Mean	31.38	32.77	32.95	34.44
Std. Deviation	14.93	11.46	30.21	34.09
Std. Error of Mean	2.928	2.444	6.754	6.818

## Sheet: Fig. S6A
	minus Rapa	plus Rapa	minus Rapa	plus Rapa
	mitotic time	mitotic time	cytokinetic time	cytokinetic time
	17	21	13	14		Mitotic time
	30	14	20	21		Unpaired t test
	15	21	15	56		P value	0.5174
	20	25	12	45		P value summary	ns
	18	25	20	8		Significantly different (P < 0.05)?	No
	20	20	23	35		One- or two-tailed P value?	Two-tailed
	62	17	20	24		t, df	t=0.6538, df=36
	15	35	10	10
	17	27	20	21		Cytokinesis time
	30	25	30	16		Unpaired t test
	50	26	25	10		P value	0.0917
	15	40	20	16		P value summary	ns
	25	18	15	39		Significantly different (P < 0.05)?	No
	25	33	15	11		One- or two-tailed P value?	Two-tailed
	20	28	15	39		t, df	t=1.740, df=31
	20	28	15
	15	17	5
	15	42	25
	15
	25
Mean	23.45	25.67	17.67	24.33
Std. Deviation	12.3	7.852	6.059	14.87
Std. Error of Mean	2.75	1.851	1.428	3.84

## Sheet: Fig. S6C
	minusRapa	minusRapa	minusRapa	plusRapa	plusRapa	plusRapa		Sidak's multiple comparisons test	Mean Diff.	95.00% CI of diff.	Significant?	Summary
	exp#1	exp#2	exp#3	exp#1	exp#2	exp#3
Apoptosis	17	12	8	24.24	25	25		-Rapa - +Rapa
Mitotic Arrest	12.2	10	22	12.12	15	7.1		Apoptosis	3.317	-12.72 to 19.35	No	ns
Completed Mitosis	70.7	77.55	70	63.64	60	67.9		Mitotic Arrest	-1.79	-17.83 to 14.25	No	ns
								Complete Mitosis	-1.54	-17.58 to 14.50	No	ns
	-Rapa			+Rapa
	Mean	SD	N	Mean	SD	N
Apoptosis	14.7633	1.96291	3	11.4467	4.83068	3
Mitotic Arrest	7.14333	4.24116	3	8.93333	2.92278	3
Completed Mitosis	78.0833	5.69963	3	79.6233	2.25664	3
	-Rapa			+Rapa
	Mean	SEM	N	Mean	SEM	N
Apoptosis	14.7633	1.13329	3	11.4467	2.78899	3
Mitotic Arrest	7.14333	2.44863	3	8.93333	1.68747	3
Completed Mitosis	78.0833	3.29069	3	79.6233	1.30287	3

## Sheet: Fig. S6D
	minusRapa	minusRapa	minusRapa	plusRapa	plusRapa	plusRapa		Sidak's multiple comparisons test	Mean Diff.	95.00% CI of diff.	Significant?	Summary
	exp#1	exp#2	exp#3	exp#1	exp#2	exp#3
Apoptosis	4.2	15	6.25	54.29	61.9	70.73		-Rapa - +Rapa
Mitotic Arrest	8.3	5	0	14.29	19.05	26.83		Apoptosis	-54.82	-84.89 to -24.75	Yes	**
Completed Mitosis	87.5	80	93.75	22.86	19.05	2.44		Mitotic Arrest	-13.01	-43.08 to 17.06	No	ns
								Complete Mitosis	70.72	40.65 to 100.8	Yes	**
	-Rapa			+Rapa
	Mean	SD	N	Mean	SD	N
Apoptosis	8.48333	5.73592	3	63.3067	9.79604	3
Mitotic Arrest	5.76667	2.25019	3	18.78	4.36127	3
Completed Mitosis	85.5	4.82183	3	14.7833	10.8581	3
	-Rapa			+Rapa
	Mean	SEM	N	Mean	SEM	N
Apoptosis	8.48333	3.31164	3	63.3067	5.65575	3
Mitotic Arrest	5.76667	1.29915	3	18.78	2.51798	3
Completed Mitosis	85.5	2.78388	3	14.7833	6.2689	3

## Sheet: Fig. S6F
	minus Rapa	plus Rapa	minus Rapa	plus Rapa
	Kif5b	Kif5b	BICD2	BICD2		Kif5b
	exp#1	exp#2	exp#1	exp#2
	40	104	35	39		Unpaired t test
	134	148	52	230		P value	0.2455
	48	31	49	39		P value summary	ns
	45	35	22	230		Significantly different (P < 0.05)?	No
	80	40	27	70		One- or two-tailed P value?	Two-tailed
	150	30	49	65		t, df	t=1.169, df=92
	125	35	45	100
	185	150	40	245
	35	20	25	80		BICD2
	70	45	35	55		Unpaired t test
	30	73	52	50		P value	<0.0001
	45	37	49	60		P value summary	****
	75	30	22	260		Significantly different (P < 0.05)?	Yes
	85	60	27	59		One- or two-tailed P value?	Two-tailed
	41	30	49	150		t, df	t=5.824, df=60
	61	50	45	75
	36	45	40	185
	75	20	25	275
	50	30	32	85
	38	30	38	123
	30	85	29	58
	80		36	195
	45		53	44
	63		27	48
	60		45	84
	58		22	68
	60		25
	30		50
	105		40
	31		48
	60		22
	45		40
	60		32
	115		38
	65		40
	75		55
	135
	195
	80
	123
	51
	29
	31
	66
	50
	40
	35
	40
	53
	99
	46
	51
	86
	56
	50
	38
	101
	50
	66
	97
	44
	81
	39
	54
	16
	35
	41
	25
	21
	50
	94
	63
	31
Mean	64.27	53.71	37.78	114.3
Std. Deviation	36.02	38.09	10.51	78.11
Std. Error of Mean	4.216	8.312	1.752	15.32
